# Supplementary material for: Neuromodulation of Limb Proprioceptive Afferents Decreases Apnea of Prematurity and Accompanying Intermittent Hypoxia and Bradycardia
Source: PLoS One. 2016 Jun 15;11(6):e0157349. doi: 10.1371/journal.pone.0157349 (PMC4909267; doi:10.1371/journal.pone.0157349)
Supplement: S1 Dataset — (XLSX) [file pone.0157349.s002.xlsx]

## Sheet: Analysis_paper_PLosONE
babyID	vibration on or off first	birthweight	Gestational age at birth	Corrected gestational age at start of study	Day of life at start of study	sex	race	oxygen treatment	caffeine treatment	range of FIO2	number of long pauses with stimulation	number of long pauses without stimulation	duration of long pauses with stimulation	duration of long pauses without stimulation	number of short pauses with stimulation	number of short pauses without stimulation	duration of short pauses with stimulation	duration of short pauses without stimulation	number of desaturations <90% with stimulation	number of desaturations <90% without stimulation	number of desaturations <88% with stimulation	number of desaturations <88% without stimulation	number of desaturations <85% with stimulation	number of desaturations <85% without stimulation	duration of desaturations <90% with stimulation	duration of desaturations <90% without stimulation	duration of desaturations <88% with stimulation	duration of desaturations <88% without stimulation	duration of desaturations <85% with stimulation	duration of desaturations <85% without stimulations	number of mild bradycardias with stimulation	number of mild bradycardias without stimulation	number of moderate bradycardias with stimulation	number of moderate bradycardias without stimulation	duration of mild bradycardias with stimulation	duration of mild bradycardias without stimulation	duration of moderate bradycardias with stimulation	duration of moderate bradycardias without stimulation	number of long pauses with stimulation [ln(x+1) transformed]	number of long pauses without stimulation [ln(x+1) transformed]	duration of long pauses with stimulation [ln(x+1) transformed]	duration of long pauses without stimulation [ln(x+1) transformed]	number of short pauses with stimulation [ln(x+1) transformed]	number of short pauses without stimulation [ln(x+1) transformed]	duration of short pauses with stimulation [ln(x+1) transformed]	duration of short pauses without stimulation [ln(x+1) transformed]	number of desaturations <90% with stimulation [ln(x+1) transformed]	number of desaturations <90% without stimulation [ln(x+1) transformed]	number of desaturations <88% with stimulation [ln(x+1) transformed]
1	ON	1115	29.5714	33	24	male	african-american	yes	yes	21-23	117	167	976	1465.5	150	183	589	634	31	40	14	16	4	6	769	818	206	343	138	57	1	39	0	31	7	702	0	578	4.77068	5.12396	6.88449	7.29063	5.01728	5.21494	6.38012	6.45362	3.46574	3.71357	2.70805
2	ON	1160	28.5714	30.1429	9	female	hispanic	yes	yes	21-24	169	230	1285	1791.5	148	155	650	682	217	240	148	153	83	95	3529	4288	1945	2263	1006	1224	3	3	2	3	21	25	15	25	5.1358	5.44242	7.15929	7.49137	5.00395	5.04986	6.47851	6.52649	5.3845	5.4848	5.00395
3	OFF	1330	30	35.5714	39	male	caucasian	no	yes	21	231	701	1584.5	4902.5	108	377	471.5	1695.5	31	67	19	38	14	20	296	544	190	322	136	177	3	16	3	12	21	146	17	122	5.44674	6.55393	7.36866	8.4977	4.69135	5.93489	6.15804	7.43632	3.46574	4.21951	2.99573
4	ON	2310	31.4286	34.8571	24	male	caucasian	yes	no	40-45	232	395	1719.5	3195	210	236	911.5	1054	96	105	61	68	29	36	1147	1678	727	1160	366	776	43	94	40	86	378	1162	346	1068	5.45104	5.98141	7.45037	8.06966	5.35186	5.46806	6.81619	6.9613	4.57471	4.66344	4.12713
5	ON	1800	31.4286	35	25	male	caucasian	no	no	21	92	175	634	1375.5	184	173	781.5	744	62	124	16	55	6	22	874	2224	210	934	1017	433	26	20	20	16	225	162	159	120	4.5326	5.17048	6.45362	7.2273	5.22036	5.15906	6.66249	6.61338	4.14313	4.82831	2.83321
6	ON	1040	27.5714	30.5714	21	female	hispanic	yes	yes	23-32	86	154	606	1198.5	154	194	635	820	110	126	70	87	30	39	3619	4584	2017	2815	715	1236	0	9	0	8	0	107	0	94	4.46591	5.04343	6.40853	7.08966	5.04343	5.273	6.4552	6.71052	4.70953	4.84419	4.26268
7	OFF	745	28.2857	29.7143	20	male	caucasian	yes	yes	21-23	168	291	1338	2118	149	186	651	819	312	282	245	251	143	162	5833	6163	3267	5234	2104	4327	12	217	9	167	21	2095	132	1882	5.1299	5.67675	7.19968	7.6587	5.01064	5.23111	6.48004	6.7093	5.7462	5.64545	5.50533
8	OFF	1090	27.7143	29.1429	10	female	african-american	yes	yes	21-45	270	419	2426.5	2936.5	135	200	655.4	872.5	31	97	19	68	14	43	296	1449	190	1048	136	705	16	18	11	14	145	156	107	117	5.60212	6.04025	7.79462	7.98531	4.91265	5.3033	6.48677	6.77251	3.46574	4.58497	2.99573
9	OFF	1095	28.1429	31.2857	22	male	asian	yes	yes	21	51	110	336.5	780	117	129	500.5	577	116	168	86	126	54	87	1310	2008	1002	1476	686	1006	98	364	85	336	1186	5222	1022	4781	3.95124	4.70953	5.82157	6.66058	4.77068	4.86753	6.2176	6.35957	4.76217	5.1299	4.46591
10	OFF	2315	33.1429	35	13	female	hispanic	no	no	21	321	387	2352.5	2647.5	194	226	846	977	91	122	78	83	30	43	2853	3986	1881	2708	320	1283	1	3	0	3	6	32	0	32	5.77455	5.96101	7.76366	7.88175	5.273	5.42495	6.7417	6.88551	4.52179	4.81218	4.36945
11	OFF	680	24.1429	30.4286	44	female	african-american	yes	yes	30-43	51	77	320.5	487.5	155	144	674.5	614	111	163	76	111	44	45	1974	4207	1208	2647	587	955	21	24	18	19	221	425	185	347	3.95124	4.35671	5.773	6.19134	5.04986	4.97673	6.51545	6.42162	4.7185	5.09987	4.34381
12	OFF	775	24.1429	30.4286	45	male	african-american	yes	yes	50-63	226	366	1647.5	2451.5	179	200	788.5	849.5	258	405	177	286	135	206	3502	5353	2525	3572	1700	2458	10	23	9	14	120	402	100	215	5.42495	5.90536	7.40762	7.80486	5.19296	5.3033	6.6714	6.74582	5.55683	6.00635	5.18178
13	OFF	1175	29.4286	32.5714	22	male	caucasian	yes	yes	21-29	113	170	923	1390.5	108	152	463.5	661	111	154	76	92	44	76	1974	2203	1208	1409	587	1217	15	32	12	26	216	120	156	100	4.7362	5.14166	6.82871	7.23814	4.69135	5.03044	6.14096	6.49527	4.7185	5.04343	4.34381
15	OFF	630	31.8571	35.1429	23	male	caucasian	yes	yes	21-25	312	336	2802	3033	128	116	572	508.5	50	88	27	60	16	35	740	713	382	435	219	212	7	14	6	9	88	373	237	290	5.7462	5.82008	7.93845	8.01764	4.85981	4.76217	6.35089	6.23343	3.93183	4.48864	3.3322
16	OFF	1595	29.2857	32.4286	22	male	caucasian	yes	yes	21-23	175	284	1355	2127	152	191	657	822	18	94	10	42	6	30	193	1233	111	523	67	376	10	23	9	14	120	402	100	215	5.17048	5.65249	7.21229	7.66294	5.03044	5.2575	6.4892	6.71296	2.94444	4.55388	2.3979
[truncated: 17 more columns]
